# Supplementary material for: Universality in the buckling behavior of drying suspension drops
Source: Royal Society of Chemistry journal article supplement (doi:10.1039/d2sm01688e), 2023-01-01
Supplement: d2sm01688e1.pdf [file d2sm01688e1.pdf]

## Supporting Information for

### Universality in Buckling Behavior of Drying Suspension Drops.

*Om Prakash Bamboriya and Mahesh S Tirumkudulu*  
*Department of Chemical Engineering, IIT Bombay, Mumbai 400076, INDIA*

Mahesh S Tirumkudulu  
Email: mahesh@che.iitb.ac.in

**This PDF file includes:**

Figures S1 to S15  
Tables S1 to S3  
SI References

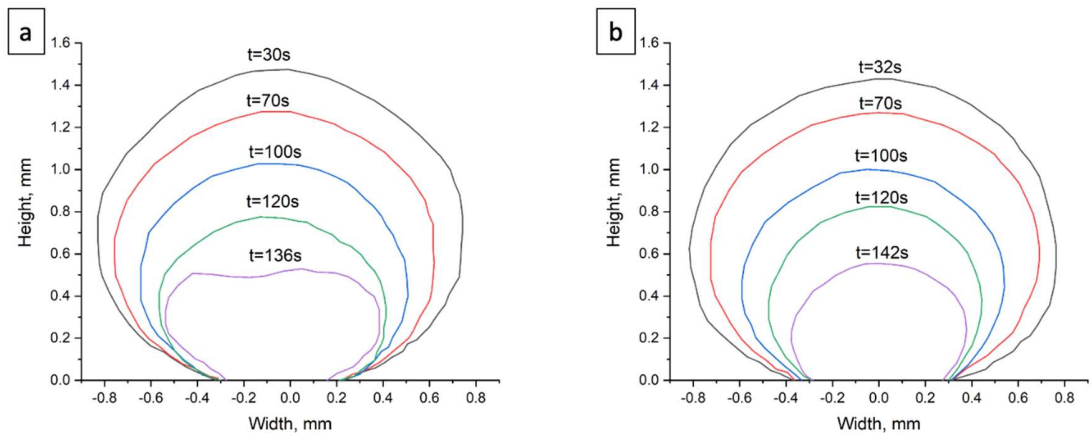

**Fig. S1.** The figures show the shape evolution of a fast drying sessile drop over a superhydrophobic surface of initial volume (a) 3  $\mu\text{L}$  containing 5  $\mu\text{m}$  PS particles, which buckles, and (b) 3  $\mu\text{L}$  containing 15  $\mu\text{m}$  PS particles, which does not buckle.

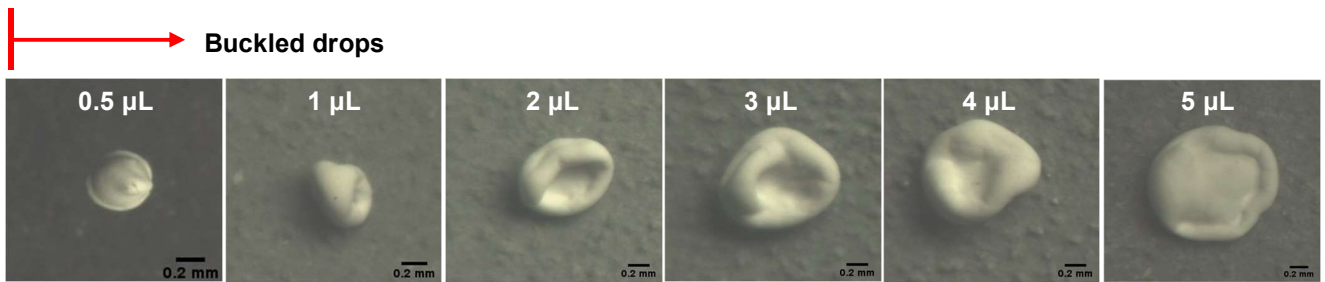

**Fig. S2.** Dried granules formed from drops with 1  $\mu\text{m}$  silica particles at 5 % (wt/wt) concentration (top view). All drops buckled during drying.

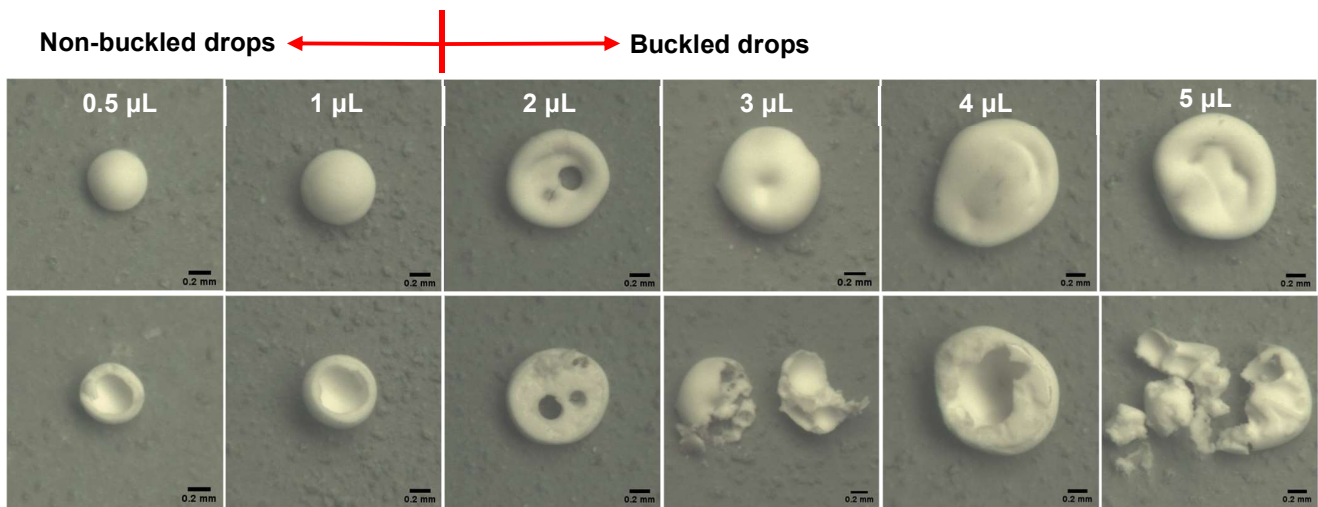

**Fig. S3.** Dried granules formed from drops with 3 μm silica particles at 5 % (wt/wt) concentration. The first row shows the top view of the dried drop while the bottom row confirms the formation of shell. Drops with initial volumes of 0.5 μL and 1 μL did not buckle while 2 μL to 5 μL drops buckled during drying.

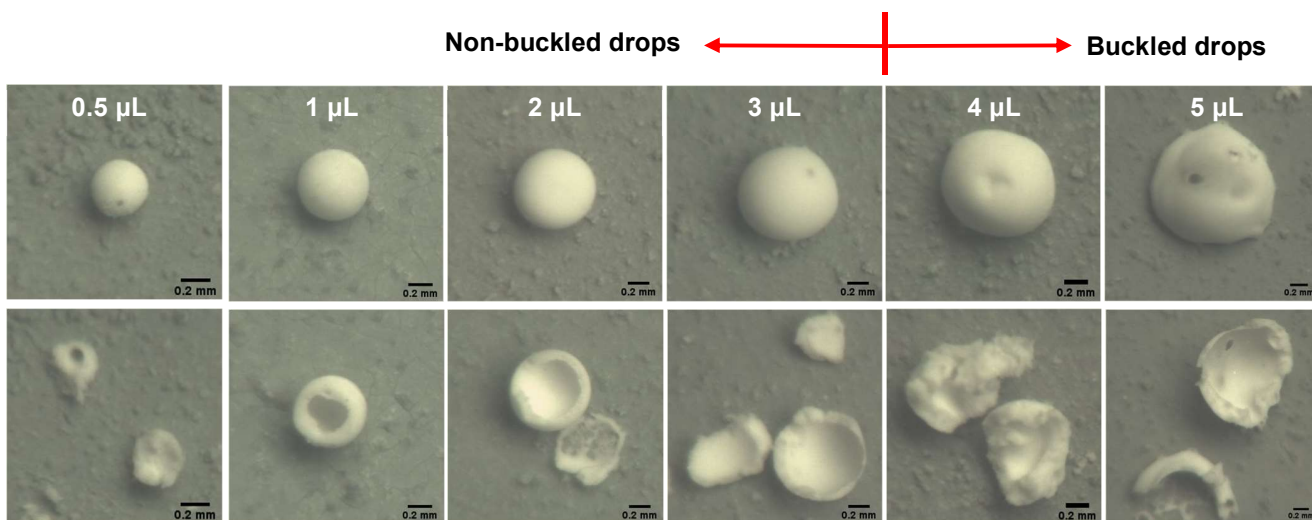

**Fig. S4.** Dried granules formed from drops with 5 μm silica particles at 5 % (wt/wt) concentration. The first row shows the top view of the dried drop while the bottom row confirms the formation of shell. Drops with initial volume of 0.5 μL to 3 μL did not buckle while the 4 μL and 5 μL drops buckled during drying.

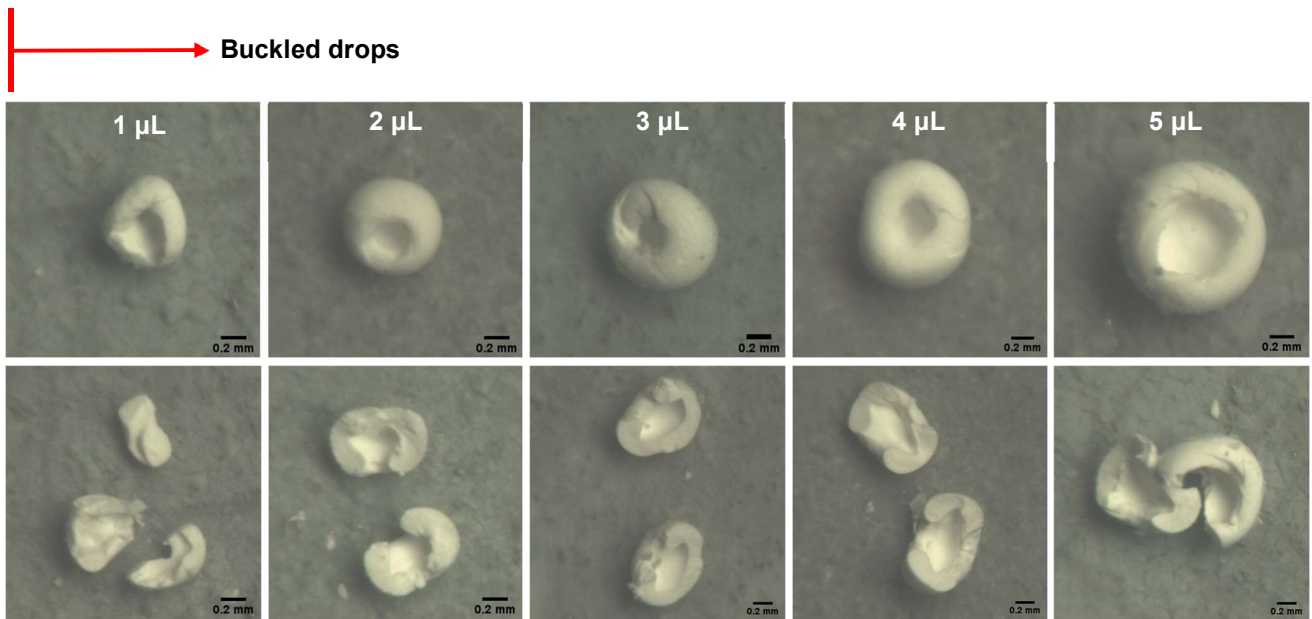

**Fig. S5.** Dried granules formed from drops with 1  $\mu\text{m}$  PS particles at 5 % (wt/wt) concentration. The first row shows the top view of the dried drop while the bottom row confirms the formation of shell. All drops buckled during drying.

→ Buckled drops

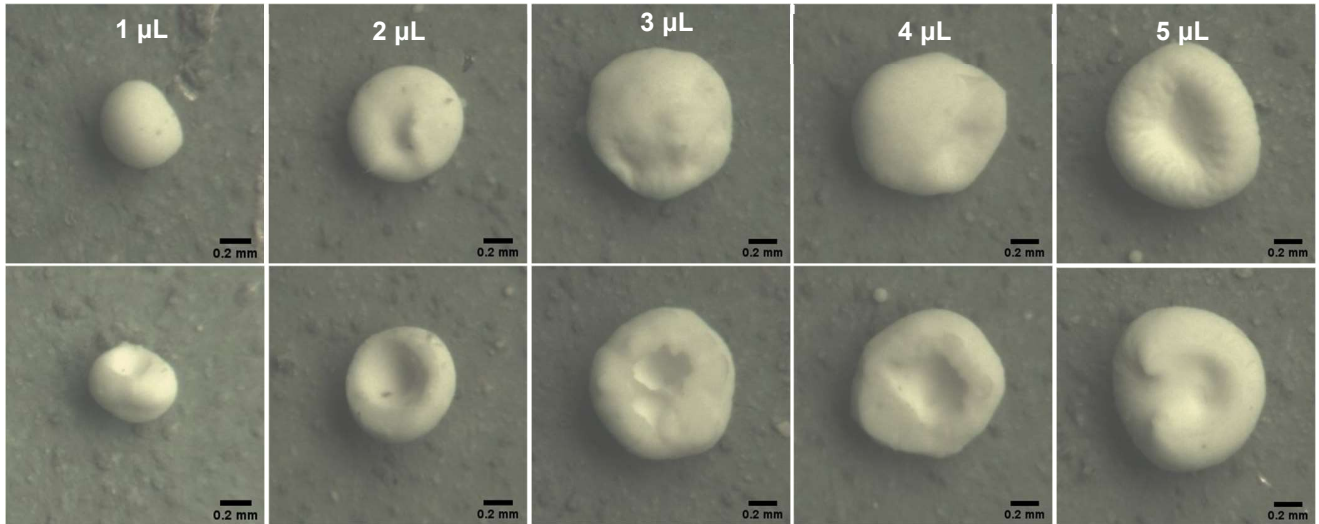

**Fig. S6.** Dried granules formed from drops with 5 μm PS particles at 5 % (wt/wt) concentration. The first row shows the top view of the dried drop while the bottom row confirms the formation of shell. All drops buckled during drying.

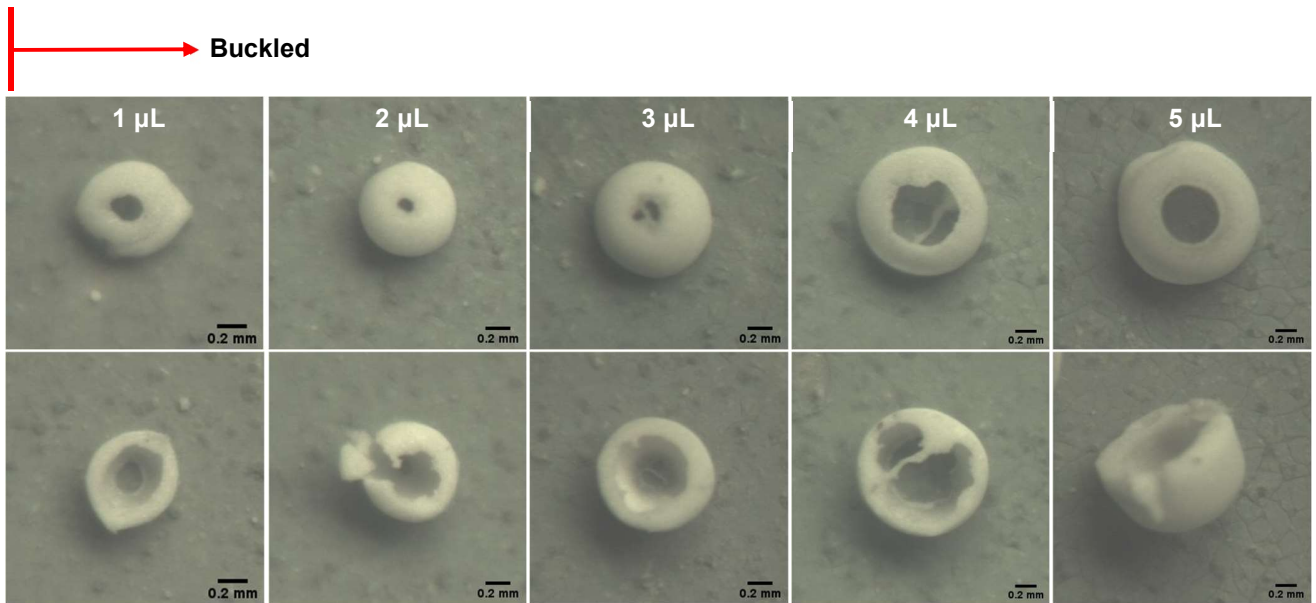

**Fig. S7.** Dried granules formed from drops with 10 µm PS particles at 5 % (wt/wt) concentration. The first row shows the top view of the dried drop while the bottom row confirms the formation of shell. All drops buckled during drying.



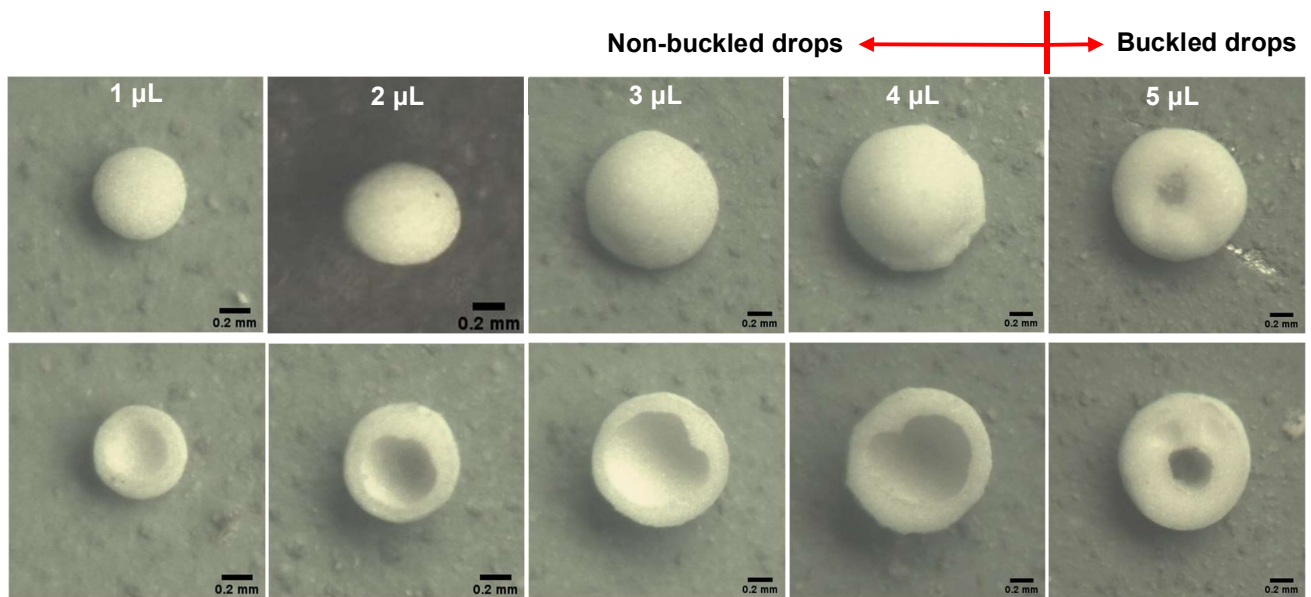

**Fig. S8.** Dried granules formed from drops with 15  $\mu\text{m}$  PS particles at 5 % (wt/wt) concentration. The first row shows the top view of the dried drop while the bottom row confirms the formation of shell. Drops with initial volume of 1  $\mu\text{L}$  to 4  $\mu\text{L}$  did not buckle while the 5  $\mu\text{L}$  drops buckled during drying.

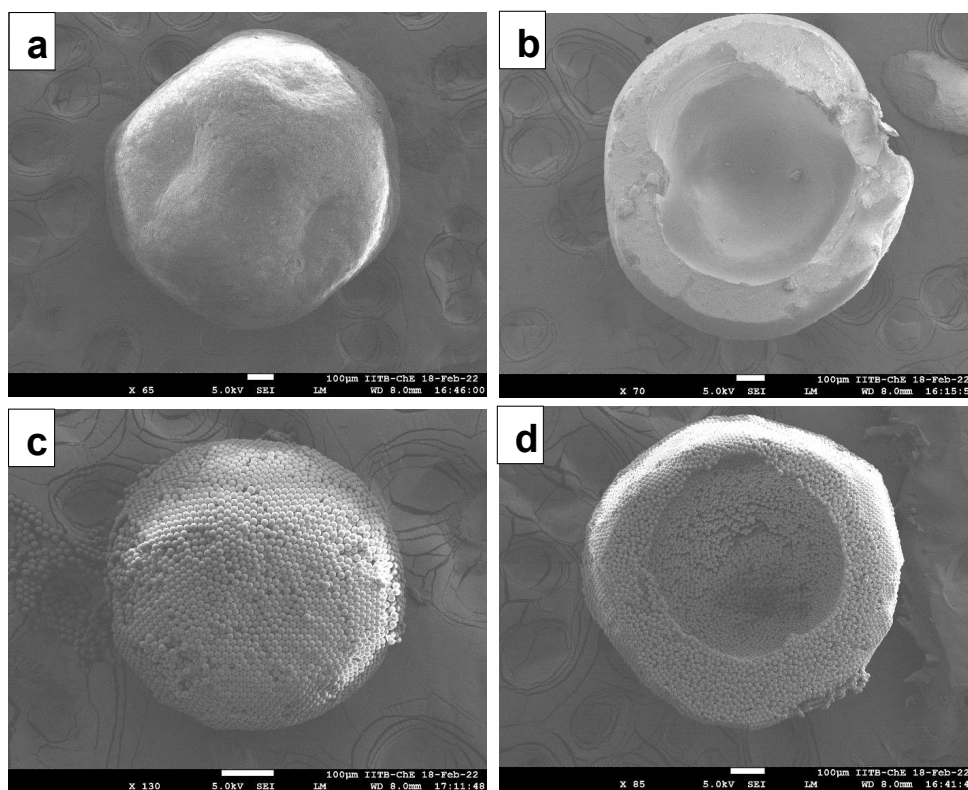

**Fig. S9.** SEM images of buckled and non-buckled dried granules. (a) Top view of a 1  $\mu\text{m}$  PS buckled shell, (b) Bottom view of a 1  $\mu\text{m}$  PS buckled shell, (c) Top view of a 15  $\mu\text{m}$  PS particles non-buckled shell, (d) Bottom view of a 15  $\mu\text{m}$  PS particles non-buckled shell.

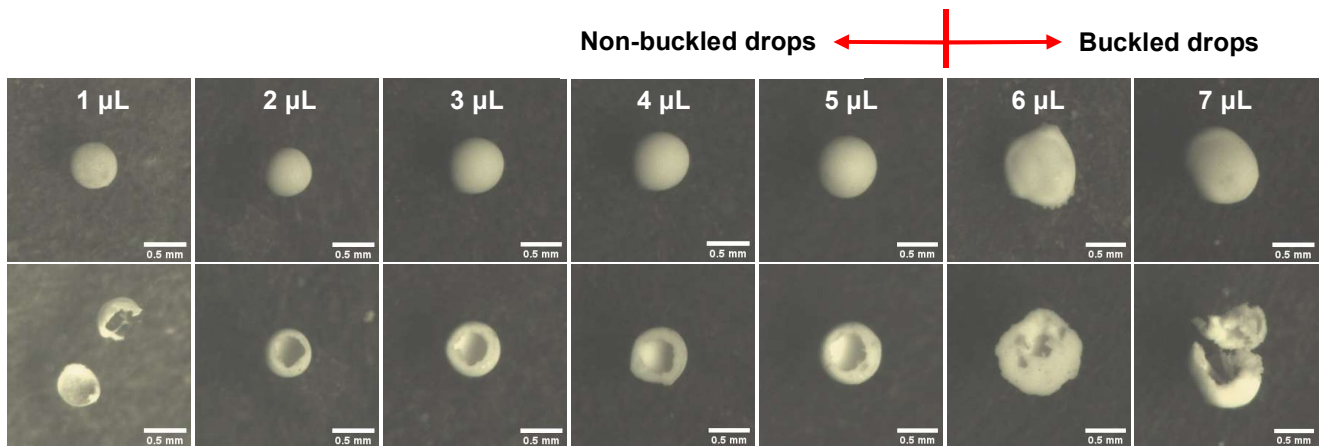

**Fig. S10.** Dried granules formed from drops with 5  $\mu\text{m}$  silica particles at 2 % (wt/wt) concentration. The first row shows the top view of the dried drop while the bottom row shows the hollow shell. Drops with initial volume of 1  $\mu\text{L}$  to 5  $\mu\text{L}$  did not buckle while the 6  $\mu\text{L}$  and 7  $\mu\text{L}$  drops buckled during drying. Compare this with the 5 % (wt/wt) suspension drop that buckled at 4  $\mu\text{L}$  and 5  $\mu\text{L}$  (Figure S4). For both cases, the critical shell radius ( $R$ ) lies between 0.4-0.5 mm suggesting that the initial concentration of particles does not influence the critical shell radius at buckling.

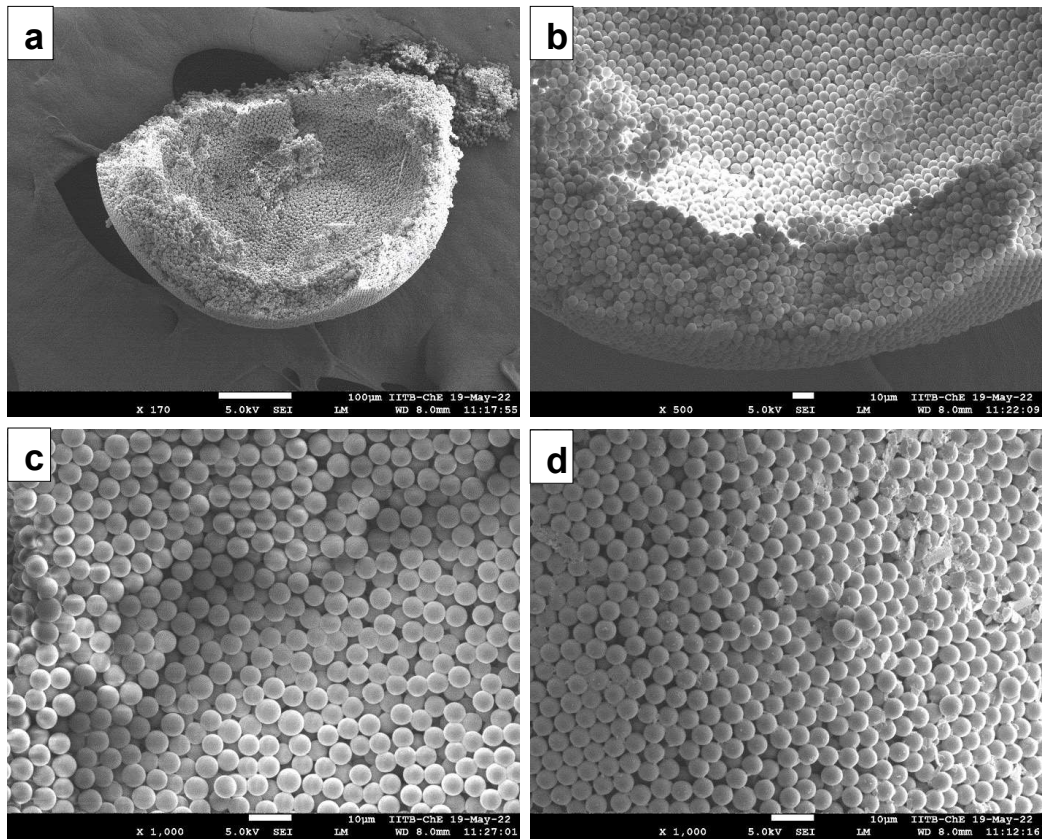

**Fig. S11.** SEM images of dried granule formed from a mixture of 5  $\mu\text{m}$  silica particles and 5  $\mu\text{m}$  PS particles (ratio of number density of particles in the mixture, silica:PS = 1.6:1). (a) and (b) Images of a section of the shell. (c) and (d) A close-up view of the particles on the outer and inner surface of the shell, respectively. These images show that the particles contained in the droplet did not undergo permanent deformation during drying thereby confirming the assumption of elastic deformation.

→ Buckled drops

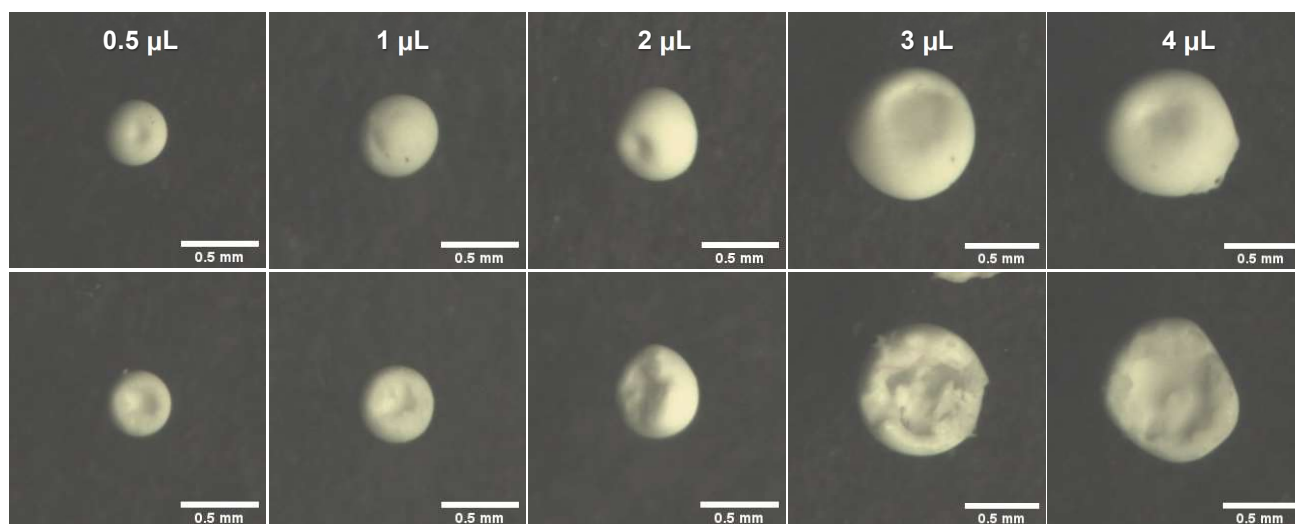

**Fig. S12.** Dried granules formed from a mixture of 5 μm and 1 μm silica particles. The mixture was prepared by mixing 10 parts of 5 μm suspension with 1 part of 1 μm suspension, each at 5 % (wt/wt) concentration. The corresponding ratio of number density is, 5 μm : 1 μm=1:12.5. The first row shows the top view of the dried drop while the bottom row confirms the formation of shell..

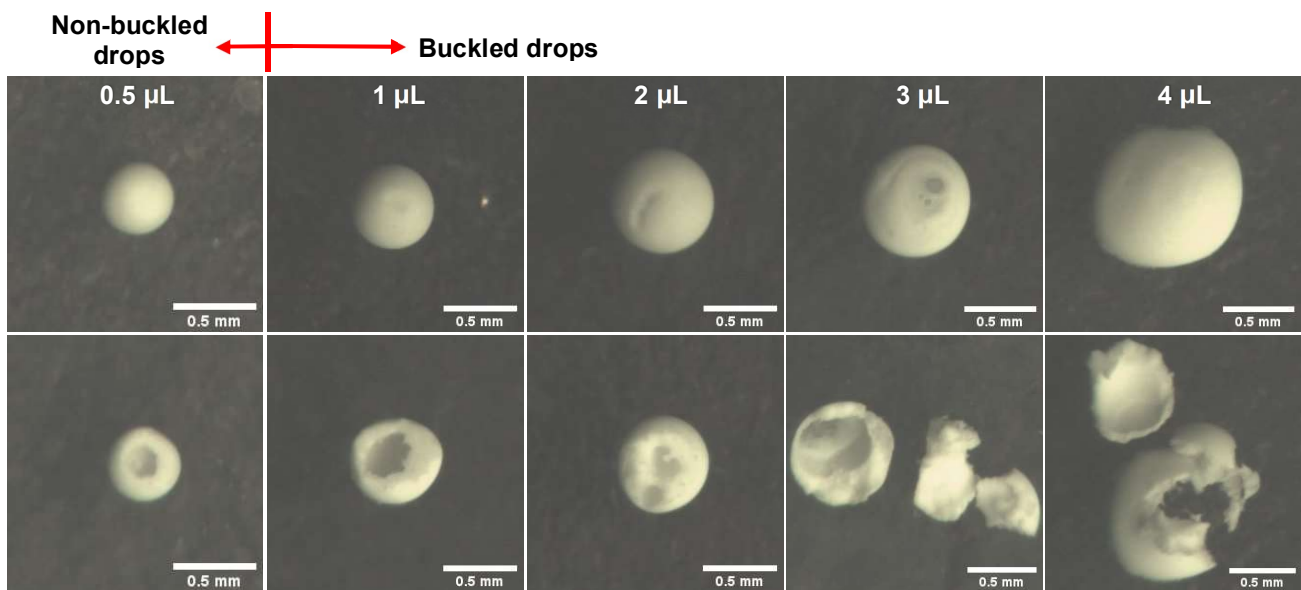

**Fig. S13.** Dried granules formed from a mixture of 5  $\mu\text{m}$  and 1  $\mu\text{m}$  silica particles. The mixture was prepared by mixing 20 parts of 5  $\mu\text{m}$  suspension with 1 part of 1  $\mu\text{m}$  suspension, each at 5 % (wt/wt) concentration. The corresponding ratio of number density is, 5  $\mu\text{m}$  : 1  $\mu\text{m}$ =1:6.25. The first row shows the top view of the dried drop while the bottom row confirms the formation of shell.

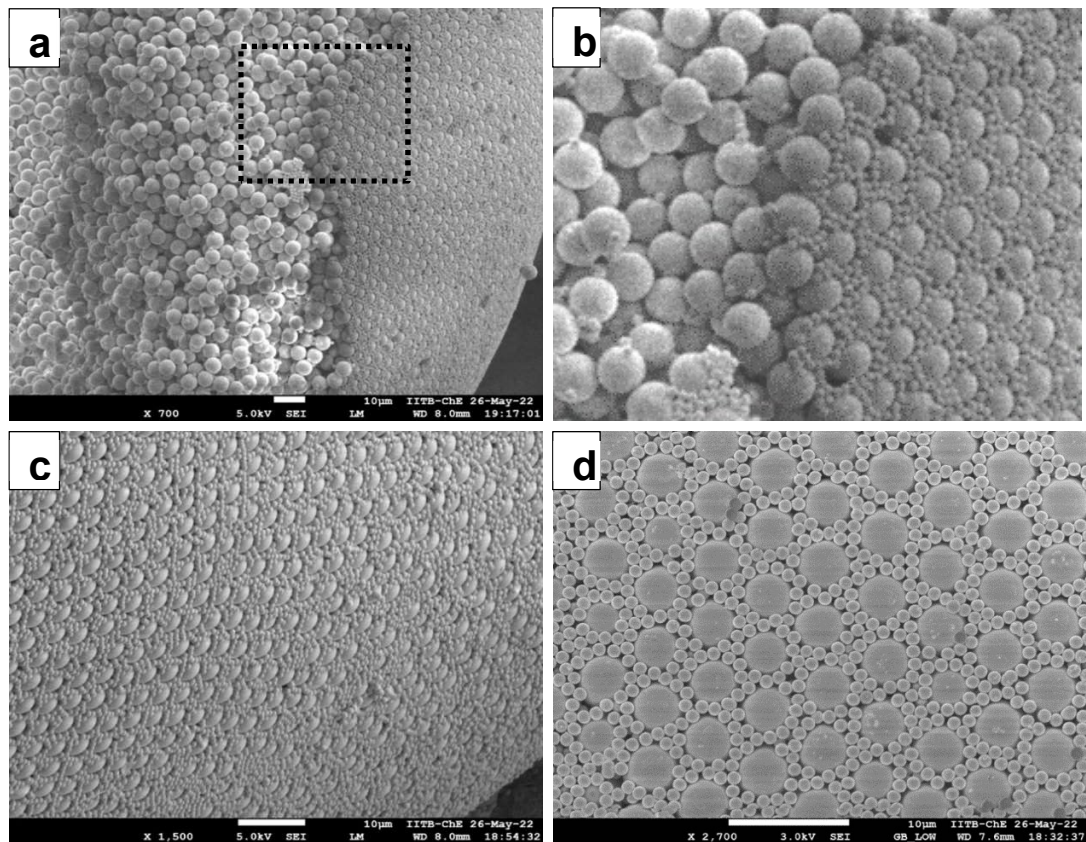

**Fig. S14.** SEM images of dried granule formed from a mixture of 5  $\mu\text{m}$  and 1  $\mu\text{m}$  silica particles (ratio of number density, 5  $\mu\text{m}$  : 1  $\mu\text{m}$ =1:12.5). (a) Image shows the shell thickness along with the arrangement of particles on the surface and through the thickness. It is clear that all small particles are close to the top surface with negligible numbers present in the interior. (b) A close-up view of the box section of image (a). (c) Ordered packing of large particles on the shell surface interspersed with smaller particles. (d) A close-up view of the shell surface.

**(a) 5  $\mu$ L drop dried at 160 °C and atmospheric pressure**

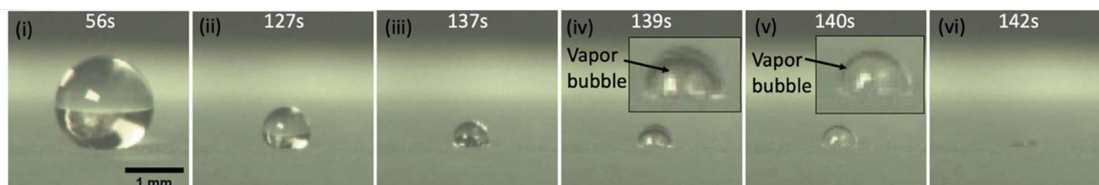

**(b) 3  $\mu$ L drop dried at 80 °C and 760 mmHg vacuum**

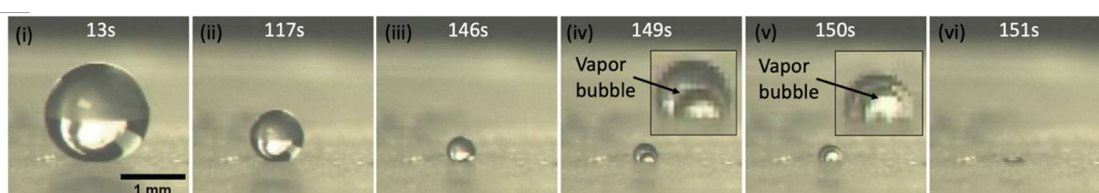

**Fig. S15.** Images of drying of pure water drop. (a) 5  $\mu$ L drop dried at 160 °C and atmospheric pressure. (b) 3  $\mu$ L drop dried at 80 °C and 760 mmHg vacuum. For both cases, a vapor bubble nucleates and expands to fill the drop, see the inset in (iv) and (v). The bubble completely evaporates within a few seconds.



**Table S1. Physical properties of particles and solvent.**

| Particle  | Supplier                  | T <sub>g</sub> (°C) | Density (g/cc) | Shear modulus (GPa) | Poisson ratio |
|-----------|---------------------------|---------------------|----------------|---------------------|---------------|
| Silica[1] | Sigma- Aldrich            | 1200                | 2.65           | 31                  | 0.17          |
| PS[2]     | Sigma- Aldrich, Cospheric | 100                 | 1.05           | 1                   | 0.34          |
| DI Water  | Milli-Q (Millipore)       | -                   | 1.0            | -                   | -             |

**Table S2. Product details of all particles used in experiments.**

| S. No. | Product name                             | Particle size | Supplier      | Product number            | Batch number | Product brand | Conc.    |
|--------|------------------------------------------|---------------|---------------|---------------------------|--------------|---------------|----------|
| 1      | Micro particles based on silicon dioxide | 1 µm          | Sigma-Aldrich | 56798                     | BCBV2906     | Sigma         | 5 % WT.  |
| 2      | Micro particles based on silicon dioxide | 3 µm          | Sigma-Aldrich | 66373                     | BCBN8195V    | Fluka         | 5 % WT.  |
| 3      | Micro particles based on silicon dioxide | 5 µm          | Sigma-Aldrich | 44054                     | BCBT0088     | Sigma         | 5 % WT.  |
| 4      | Micro particles based on polystyrene     | 1 µm          | Sigma-Aldrich | 89904                     | BCBR6474V    | Sigma         | 10 % WT. |
| 5      | Micro particles based on polystyrene     | 5 µm          | Sigma-Aldrich | 79633                     | BCCF6420     | Sigma-Aldrich | 10 % WT. |
| 6      | Micro particles based on polystyrene     | 10 µm         | Sigma-Aldrich | 72986                     | BCBW4523     | Sigma-Aldrich | 10 % WT. |
| 7      | Micro particles based on polystyrene     | 15 µm         | Sigma-Aldrich | 74964                     | BCCG3435     | Sigma-Aldrich | 10 % WT. |
| 8      | Polystyrene microsphere                  | 14-20 µm      | Cospheric     | PSMS-1.07 14-20um - 500mg | NA           | Cospheric     | Powder   |

**Table S3.** Instruments and manufacturer.

| <b>Instrument</b>                    | <b>Manufacturer</b>             |
|--------------------------------------|---------------------------------|
| Vacuum oven                          | Pooja Lab, Mumbai, INDIA        |
| Micropipette                         | Eppendorf Research              |
| USB Microscope camera                | Lumenera Infinity-1             |
| Contact angle measurement Goniometer | GBX Digidrop, Software: Windrop |
| FESEM                                | JSM 7600F, JEOL Inc.            |

## SI References

1. <https://www.azom.com/properties.aspx?ArticleID=1114>. (Accessed on Oct 27, 2022)
2. Mott, P.H., Dorgan, J.R. and Roland, C.M., 2008. The bulk modulus and Poisson's ratio of "incompressible" materials. *Journal of Sound and Vibration*, 312(4-5), pp.572-575.
